1 **Running head:** Turanose mediated WOX5 expression rescues *cre1*

2

3

4

5 **\* Author for correspondence:**

6 Maitrayee DasGupta

7 Address: Department of Biochemistry, University of Calcutta,

8 35, Ballygunge Circular Road, Kolkata-700019, West Bengal, India

9 Phone No. +91-33-2475-4680; Fax: +91-33-2476-4419

10 Email ID: [maitrayee\\_d@hotmail.com](mailto:maitrayee_d@hotmail.com)

11

12

13 **Journal Research area:**

14 Signalling and response

15

16

17

18

19

20

21

22

23

24

25

26

27 **Turanose mediated *WOX5* expression rescues symbiosis in cytokinin perception mutant**  
28 ***cre1***

29

30 Anindya Kundu<sup>1,2</sup>, Firoz Molla<sup>1</sup> and Maitrayee DasGupta<sup>1\*</sup>

31 <sup>1</sup> Department of Biochemistry, University of Calcutta, Kolkata 700019, India

32

33

34

35

36

37

38 **One sentence summary:**

39 Sugar signalling rescues symbiosis in *Medicago truncatula* cytokinin perception mutant *cre1*

40

41 **Keywords:**

42 Cytokinin signalling, Sugar signalling, turanose, *WOX5*, root nodule symbiosis

43

44

45

46

47

48

49

50

51

52

53

54

55

56

57

58 **Footnotes**

59

60 \*Address correspondence to maitrayee\_d@hotmail.com

61 **Author contribution:**

62 A.K. M.D., conceived the idea; A.K. and F.M. performed experiments and analysed the data.

63 A.K. and M.D wrote the paper. All authors read and approved the final manuscript.

64

65 **Financial support:**

66 This work was funded by Grants from Govt. of India: DST (DST EMR/2015/001006).

67 Fellowship to A.K (Council of Scientific and Industrial Research, CSIR-09/028[0756]/2009–

68 EMR–I) and fellowship to F.M (University Grant Commission, No.F.16-6(DEC.2016)/2017

69 (NET).UGC Ref no- 771

70

71 <sup>2</sup>**Present address:** NIAB EMR, Kent, UK

72

73 The authors declare no conflict of interest.

74

75

76

77

78

79

80

81

82

83

84

85

86

87 **ABSTRACT**

88

89 Rhizobia-legume interaction recruits cytokinin for the induction of nodule primordia in the  
90 cortex. In *Medicago truncatula*, cytokinin signalling involves flavonoid mediated local  
91 alteration of polar auxin transport for triggering cortical cell division. Since sugar signalling  
92 is widely evidenced to trigger auxin responses, we explored whether sugar treatment could  
93 compensate for cytokinin signalling in *M. truncatula* cytokinin perception mutant *cre1*.  
94 Herein we demonstrate that turanose, a non-metabolizable sucrose analogue can trigger auxin  
95 response and show signs of recovery of symbiosis in *cre1*. Additionally, turanose upregulated  
96 the expression of WUSCHEL-related homeobox 5 (*MtWOX5*) which prompted us to check if  
97 overexpression of *WOX5* could rescue *cre1*. Intriguingly, while overexpression of *MtWOX5*  
98 failed, *WOX5* from *Arachis hypogaea* (*AhWOX5*) completely restored functional symbiosis  
99 in *cre1* with an efficiency resembling the wildtype. This indicate that indeterminate and  
100 determinate *WOX5* responds to differential cues for nodule development and is consistent  
101 with their distinct clustering in distance trees. The mechanism of compensation of cytokinin  
102 signalling for recovery of symbiosis in *cre1* was distinct for turanose treatment and *AhWOX5*  
103 expression. Turanose increased *MtHK2* level by ~5-fold and doubled the level of *MtRR4*  
104 whereas *AhWOX5* elevated the level of *MtRR4* by ~12-fold without affecting the level of  
105 *MtHK2/3*. Thus, turanose compensated MtCRE1 at receptor level whereas *WOX5* restored  
106 the signalling at the level of response regulators. We propose a working model to discuss  
107 how sugar mediated *WOX5* signalling have compensated MtCRE1 to recover normal  
108 progress of symbiosis in *cre1*.

109

110

111

112

113

114

115

116

117

118

119

120

## 121 INTRODUCTION

122

123 In root nodule symbiosis (RNS) rhizobia-legume interaction activates the SYM pathway  
124 which in turn activates cytokinin response for the induction of a *de novo* meristem in the root  
125 cortical cells (Frugier et al., 2008). Cytokinin-signaling causes local auxin accumulation at  
126 the site of incipient nodule primordia by modulating the expression of auxin transporters (Plet  
127 et al., 2011; Ng et al., 2015). These phytohormonal signals and the SYM pathway together  
128 reprogram the cortical cells and regulate their division, ultimately building a nodule  
129 primordium for the endocytic accommodation of the symbionts (Mathesius et al., 2000;  
130 Suzaki et al., 2012).

131 Several evidences projected the hierarchical organization of the Nod factor-dependent  
132 activation of SYM-Pathway and cytokinin signalling pathway (Frugier et al., 2008). For  
133 example, Nod factor induced accumulation of cytokinin by upregulation of several cytokinin  
134 biosynthesis genes indicates its precedence to cytokinin signalling (Held et al., 2014; Van  
135 Zeijl et al., 2015). This explains why majority of Nod factor-induced transcriptional changes  
136 were absent in Cytokinin Perception Mutant *cre1* in *M. truncatula* (Van Zeijl et al., 2015).  
137 Genetic evidences further confirm this hierarchy, when constitutive activation of CCaMK  
138 (*snf1*) fails to trigger spontaneous nodulation in absence of cytokinin signalling in *cre1*  
139 whereas constitutive activation of cytokinin receptor LHK1 (*snf2*) triggered nodulation in  
140 *dmi2* (Madsen et al., 2010). Cytokinin oxidase/dehydrogenase expressed during nodule  
141 development restricts the level of active cytokinin for balancing its positive role in nodule  
142 organogenesis with its negative effect on rhizobial infection at the root epidermis (Reid et al.,  
143 2016). Therefore, apart from being the key endogenous signal for nodule development and  
144 differentiation (Plet et al., 2011; Kundu and DASGupta, 2018), cytokinin also maintains the  
145 homeostasis of the symbiotic interaction indicating that the SYM pathway and cytokinin  
146 signaling are connected through feedback loops (Miri et al., 2016).

147 Hierarchically auxin is projected to act next to cytokinin during nodule development (Plet et  
148 al., 2011; Suzaki et al., 2012). Several evidences indicated directional transport and local  
149 accumulation of auxin to be important for the development of nodule primordia and  
150 accordingly application of auxin transport inhibitors is sufficient to induce nodule-like cell  
151 division (Rightmyer and Long, 2011; Ng et al., 2015). Accumulation of auxin could be either  
152 due to regulation of its transport or biosynthesis and cytokinin is known to regulate both these  
153 processes (Van Noorden et al., 2006; Pernisová et al., 2009; Jones et al., 2010). The response

154 regulators (RRs), functioning downstream to cytokinin receptors modulate auxin signaling  
155 via SHY2 mediated downregulation of auxin transporters (Dello Ioio et al., 2008;  
156 Moubayidin et al., 2010). Recent evidence revealed that cytokinin controls flavonoid  
157 concentration in roots and local application of flavonoid could recover nodulation in the  
158 cytokinin perception mutant *cre1* mutant of *M. truncatula* (Ng et al., 2015). Intriguingly,  
159 auxin transport inhibitors can cause pseudonodule formation in SYM pathway mutants like  
160 *nsp2* and *nin* that function downstream of cytokinin signalling further indicating that auxin  
161 accumulation and response could be the final call for initiation of cortical cell division during  
162 RNS (Rightmyer and Long, 2011).

163 Sugars play a role in plant development and several evidences indicate a crosstalk between  
164 sugar signalling and auxin responses. For example, (i) there are mutants that are commonly  
165 resistant to both sugar and auxin responses (Ohto et al., 2006), (ii) auxin biosynthetic genes  
166 are modulated by sugar status (Leclere et al., 2010; Sairanen et al., 2013) and (iii) there is a  
167 connection between polar auxin transport and sugar metabolism (Stokes et al., 2013).  
168 Moreover, sugar signalling is also responsible for specific developmental responses like  
169 trehalose mediated inhibition of root elongation and glucose affecting root architecture  
170 through auxin-based signal transduction (Wingler et al., 2000; Mishra et al., 2009). Sugar  
171 signalling is also connected with auxin response of the conserved WUS (WUSCHEL)/WOX  
172 (WUSCHEL-related homeobox gene)-CLV regulatory system that are involved in meristem  
173 maintenance. For example, WOX9 is typically required for auxin response in Shoot Apical  
174 meristem (SAM) and sucrose can compensate for loss of WOX9(*stip*), that arrests growth  
175 soon after germination (Xuelin Wu, Tsagaye Dabi, 2005). Also, the expression of WOX5,  
176 which maintains localized auxin maxima in the root apical meristem (RAM) is induced by  
177 auxin and turanose, a non-metabolizable sucrose analogue (Gonzali et al., 2005).

178 CRE1(CYTOKININ RESPONSE1), an orthologue of AHK4, is a membrane-bound  
179 cytokinin receptor necessary for nodulation in *M. truncatula* (Gonzalez-Rizzo et al., 2006;  
180 Plet et al., 2011). Earlier reports indicated that the *M. truncatula cre1* mutant is defective in  
181 auxin accumulation in the root cortex following *S. meliloti* inoculation (Ng et al., 2015). A  
182 plausible hypothesis could be that sugar signalling would rescue cytokinin perception mutant  
183 *cre1* by inducing auxin responses. Sucrose is an important metabolite transported to nodules  
184 and sucrose transporters are upregulated with rhizobial infection but their specific role in  
185 signalling during nodule development is still oblivious (Lalonde et al., 2004; Ayre, 2011).  
186 Turanose, a nonmetabolizable analogue of sucrose provides an opportunity to study its role as

187 a signalling molecule (Sinha et al., 2002). Herein we show that turanose treatment  
188 upregulates auxin responses and successfully rescues the nodulation efficiency in *cre1*.  
189 Turanose treatment induced the expression of WOX5 which is in consistence with earlier  
190 reports demonstrating that WOX5 functions downstream to auxin signalling for the initiation  
191 of nodule primordia (Chen et al., 2009; Osipova et al., 2012). Finally, we demonstrated that  
192 WOX5 overexpression can rescue *cre1* with an efficiency resembling the wildtype but were  
193 intrigued to find that only *AhWOX5* from *Arachis hypogaea* (determinate) but not *MtWOX5*  
194 (indeterminate) could do so. This indicated WOX5 from indeterminate and determinate  
195 legume responds differential cues for their functional activation. A working hypothesis is  
196 proposed based on our observations on how turanose treatment and WOX5 expression could  
197 have compensated MtCRE1 for restoring symbiosis in *cre1*.

198

## 199 **RESULTS**

200

### 201 **Turanose rescues nodulation in cytokinin perception mutant *cre1***

202 Based on several evidences that highlight the crosstalk between sugar signalling and auxin  
203 responses we wanted to explore whether sugar signalling could rescue rhizobial symbiosis in  
204 cytokinin perception mutant *cre1* (Leclere et al., 2010; Ljung et al., 2015). For this we used  
205 turanose, a nonmetabolizable sucrose which is previously reported to trigger auxin response  
206 (Gonzali et al., 2005). Both *A17* and *cre1* roots were grown on plates with  $10^{-2}$ M or  $10^{-3}$ M of  
207 turanose for 1 week before being infected with *Sinorhizobium meliloti Sm2011-pBHR-mRFP*.  
208 Turanose treatment did not have any significant effect on root and shoot length and the lateral  
209 root number in either *A17* or *cre1* plants (Supplementary Fig. 1). The effect on nodule  
210 development was significant where  $10^{-3}$ M Turanose provided the best efficacy in nodule  
211 formation in *cre1* and therefore was used in all later experiments. At 4WAI, there were  $\sim 1.4$   
212  $\pm 0.9$  nodules in untreated *cre1* roots whereas turanose treatment resulted in formation of  $\sim 12$   
213  $\pm 3.3$  nodules per plant (Fig 1a). Almost 42% of the turanose rescued nodules in *cre1* were  
214 pink functional nodules, with proper colonization and differentiation of bacteroids (Fig. 1a-c).  
215 In the rest of the nodules that were nonfunctional and whitish, rhizobia were mostly trapped  
216 in the nodule apex (Fig1b) or entrapped in cortical infection threads (Fig1c). As compared to  
217 *cre1*, nodulation was much higher in *A17* plants. On an average turanose untreated *A17*  
218 plants produced  $\sim 21 \pm 2.9$  nodules by 3WAI which increased to  $\sim 28 \pm 8.7$  nodules upon  
219 turanose treatment without any significant change in the number of functional nodules. The  
220 increase in nodule number in *A17*/turanose is primarily because of significant increase in

221 merged white nodules where rhizobia were entrapped in infection threads in the infection  
222 zone (Fig 1c). It may be noted that formation of merged nodules is a common feature in  
223 turanose treated *cre1* and A17 roots indicating that turanose induced loss of spatial  
224 distribution is independent of CRE1 mediated cytokinin signalling. This higher number of  
225 merged nodules can be explained by higher auxin concentration that led to increased cortical  
226 cell division as previously reported for supernodulating mutant of *Medicago sunn-4* where  
227 such disorder in spatial distribution pattern was noted (Schnabel et al., 2005; Van Noorden et  
228 al., 2006).

229

### 230 **Turanose treatment triggered cytokinin and auxin responses and induced *WOX5*** 231 **expression in *cre1***

232 For the readout of cytokinin and auxin signalling, A17 and *cre1* roots were transformed with  
233 *pTCS:GUS* ( Fig.2a-f ) and *pDR5:GUS* (Fig.2g-l) respectively (Suzaki et al., 2012;  
234 Breakspear et al., 2014; Ng et al., 2015). The transgenic roots were treated with  $10^{-3}$ M  
235 turanose for 1 week before scoring the read out using untreated roots and infected roots at  
236 1WAI as reference. In untreated A17 and *cre1* roots *pTCS:GUS* expression was barely  
237 detectable and was strictly restricted to root tips (Fig.2a and d). Turanose treatment  
238 significantly enhanced *pTCS:GUS* expression in both A17 and *cre1* roots and in both cases  
239 the expression was spread in the root hair zone (Fig.2b and e). The infected *cre1* roots were  
240 in complete contrast where cytokinin response was significantly lower and restricted to root  
241 tips as compared to the turanose treated *cre1* roots or the infected A17 roots (Fig.2c, e and  
242 f).This absence of cytokinin response in infected *cre1* roots explains the symbiotic  
243 inefficiency of this mutant whereas the increase in cytokinin response in presence of turanose  
244 explains the rescue of nodulation in *cre1*. Expression of *pDR5:GUS* was low in untreated  
245 A17 roots which barely increased upon turanose treatment and in both cases, expression was  
246 restricted within root tips and vascular bundles (Fig. 2g-h). In untreated *cre1*, expression of  
247 *pDR5:GUS* was also low and primarily restricted to root tips (Fig.2j). In contrast to these  
248 cases, turanose treated *cre1* roots had a significant increase in *pDR5:GUS* expression  
249 throughout the root system indicating MtCRE1 to antagonise the sugar mediated auxin  
250 response (Fig. 2k). In infected A17 roots the auxin response was significantly higher than the  
251 corresponding turanose treated roots which is in complete contrast with *cre1* roots where  
252 auxin response was significantly lower in infected roots as compared to the turanose treated  
253 roots (Fig.2i and l). This absence of auxin response in infected *cre1* roots explains the



254 symbiotic inefficiency of this mutant whereas the increase in auxin response in presence of  
255 turanose explains the rescue of nodulation in *cre1*.

256 Earlier reports indicated that auxin treatment upregulated *MtWOX5* expression and there is  
257 significant increase in expression of *MtWOX5* transcription factor during nodulation in *M.*  
258 *truncatula* roots (Gonzali et al., 2005; Chen et al., 2009; Osipova et al., 2012). Additionally,  
259 (Gonzali et al., 2005) demonstrated that turanose can induce *AtWOX5* expression through an  
260 auxin mediated pathway in *Arabidopsis*. We checked whether elevated auxin response in  
261 turanose treated *cre1* roots was accompanied with upregulation of expression of *MtWOX5*.  
262 For this we monitored the level of *pWOX5:GUS* expression after turanose treatment and used  
263 untreated roots and infected roots at 1WAI as reference. Expression of *MtWOX5* in  
264 untreated roots of A17 was very low whereas in *cre1* it was relatively higher (Fig.2m, p and  
265 Supplementary Fig. 2). In both cases expression of *pWOX5:GUS* was primarily restricted to  
266 root tips though in *cre1* it was diffused throughout the root system indicating MtCRE1 to  
267 have a role in restricting the expression of *MtWOX5*. Upon turanose treatment *pWOX5:GUS*  
268 expression significantly increased in both A17 and *cre1* and the expression was spread in the  
269 entire root system (Fig.2n and q, Supplementary fig.2). In both cases expression of *pWOX5-*  
270 *GUS* was higher in infected as compared to uninfected roots but was significantly lower than  
271 turanose treated roots (Fig.2o and r). The correlation between auxin response and *MtWOX5*  
272 expression was distinct in A17 and *cre1* roots. In turanose treated A17 roots lower auxin  
273 response was coupled with higher *MtWOX5* expression whereas in turanose treated *cre1* roots  
274 the expanded expression of *pWOX5:GUS* correlated well with ectopic up-regulation of  
275 *pDR5:GUS* signals. On the other hand, in infected A17 and *cre1* roots auxin responses  
276 correlates well with *pWOX5:GUS* expression where responses were higher in A17 and lower  
277 in *cre1*.

278

### 279 **WOX5 from *Arachis hypogaea* (*AhWOX5*) rescues nodulation in cytokinin perception** 280 **mutant *cre1***

281 The significant increase in WOX5 expression in turanose treated *cre1* roots raises the  
282 question whether overexpression of a single homeodomain transcription factor like WOX5  
283 would rescue the symbiotic phenotypes in *cre1*. Phylogenetically WOX5 from determinate  
284 nodule forming legumes like *Arachis hypogaea*, *Glycine max*, *Vigna angularis*, *Cajanus*  
285 *cajan* and *Phaseolus vulgaris* and indeterminate nodulators like *Cicer arietinum*, *Pisum*

286 *sativum*, *Medicago truncatula* and *Trifolium subterraneum* distinctly clusters in a distance  
287 tree and therefore could be amenable to distinct regulations (Supplementary fig. 3). Recent  
288 evidences indicate that auxin and cytokinin signalling are differentially regulated depending  
289 upon the nodule ontogeny (Ng and Mathesius, 2018). While acropetal auxin transport  
290 inhibition is essential for indeterminate nodule development, it is dispensable for determinate  
291 nodulation. We therefore attempted to rescue *cre1* by overexpressing *MtWOX5* and *AhWOX5*  
292 from a determinate legume like *Arachis hypogaea*. *MtWOX5* is 86% similar to *AhWOX5* and  
293 the homeobox domain is highly conserved with 96% similarity (Supplementary fig. 3).

294 Full length *MtWOX5* and *AhWOX5* was amplified from cDNA prepared from respective plant  
295 roots. *MtWOX5* codes for a protein of 184aa (XP\_003616581.1) and *AhWOX5* codes for a  
296 protein of 215aa (KT820790). Transformed roots of *cre1* overexpressing *MtWOX5* and  
297 *AhWOX5* were inoculated with *S. meliloti Sm2011-pBHR-mRFP* and *Sm1021-pXLGD4-lacZ*  
298 (Fig.3a-d). Infection threads were detectable within 2-3WAI in both vector transformed and  
299 *MtWOX5* overexpressed *cre1* roots but almost all of them were abandoned in the root hair or  
300 epidermis (Fig.3a-b). In both cases cortical cell division was noted but these primordia like  
301 structures remain uninfected (Fig.3a). On the other hand, within 2WAI, overexpression of  
302 *AhWOX5* resulted in formation of ~10 normal ITs per root system (Fig.3a-b). The normal  
303 ITs progressed towards the subtending nodule primordia generated in the cortex to ensure  
304 proper rhizobial accommodation. In accordance with the abnormal progression of ITs there  
305 was no improvement of nodulation efficiency in *MtWOX5* overexpressing *cre1* roots even at  
306 6WAI (n=10). But overexpression of *AhWOX5* lead to significant nodulation in *cre1* roots by  
307 4WAI where the total number of nodules was comparable to wild type A17 roots (Fig.3c).  
308 Almost 75% of these nodules were pink and could reduce acetylene and ultrastructure  
309 analysis revealed them to have properly differentiated bacteroids (Fig.3f-g). Rest of the  
310 nodules that were whitish, resembled the nodules formed in *cre1* or *MtWOX5* overexpressed  
311 *cre1* where bacteria were either trapped inside infection threads in the nodule apex or were  
312 trapped within a network of infection threads in the infection zone (Fig.3g). The level of  
313 expression of *WOX5* in *MtWOX5* and *AhWOX5* overexpressed *cre1* roots were comparable  
314 indicating that *MtWOX5* requires further functional cues to become functional in *cre1*  
315 (Fig.3e). Since overexpression of neither *AhWOX5* nor *MtWOX5* had any effect in nodule  
316 number or their organisation in A17, it is clear that their signalling output is under the  
317 homeostatic control of a large network of fate governing factors.

318

319 **Effect of turanose treatment and *AhWOX5* overexpression on cytokinin signalling**  
320 **during recovery of symbiosis in *cre1***

321 To understand how cytokinin signalling was compensated for the recovery of symbiosis we  
322 checked the expression of cytokinin signalling components in turanose treated and *AhWOX5*  
323 overexpressed nodulated roots of *cre1*. First, we checked the expression of other paralogous  
324 of *MtCRE1* like *MtHK2* and *MtHK3*. It was noted earlier that the late and inefficient nodule  
325 development in *cre1* is due to the redundant involvement of receptors *MtHK2* and *MtHK3*  
326 (Held et al., 2014; Boivin et al., 2016). Intriguingly, in turanose treated A17 roots expression  
327 of both these receptors increased by ~20-fold (Fig.4a-c) demonstrating a direct involvement  
328 of sugar signalling in cytokinin response. Upon turanose treatment in *cre1*, expression of  
329 *MtHK2* increased by ~5-fold without any notable increase in *MtHK3* indicating a role of  
330 *MtCRE1* in regulating the sugar signalling mediated expression of *MtHK3*. The increased  
331 expression of *MtHK2* appeared to compensate for *MtCRE1* in the receptor level and  
332 explained the restoration of symbiosis in *cre1*. In contrast to turanose treatment where  
333 *MtHK2* and *MtHK3* expression was upregulated, their expression was unaffected in presence  
334 of *AhWOX5* in both A17 and *cre1* roots. This suggests the mechanism of compensation of  
335 *MtCRE1* by *AhWOX5* overexpression must be downstream.

336 Downstream to cytokinin receptors, a histidyl-aspartyl multistep phosphorelay is initiated,  
337 leading to the expression of Type-A RRs as primary response genes. Several type-A RRs  
338 such as *MtRR4*, *MtRR8* and *MtRR9* are induced during nodulation and coordinate the  
339 downstream functional responses (Gonzalez-Rizzo et al., 2006; Tirichine et al., 2007; Op den  
340 Camp et al., 2011). We therefore checked the expression of these Type-A RRs in nodulated  
341 roots of turanose treated and *AhWOX5* overexpressed *cre1* and A17 (Fig.4d-f). In turanose  
342 treated A17 roots, where *MtHK2/3* expression was ~20-fold higher, the level of *MtRR4* just  
343 doubled whereas in *AhWOX5* overexpressed roots where *MtHK2/3* expression was  
344 significantly low, *MtRR4* level still increased by ~1.5-fold indicating that the expression of  
345 *MtRR4* may not be a perfect readout for the level of *MtHK2* and *MtHK3* (Fig.4d). In *cre1*, the  
346 intrinsic expression of *MtRR4* was lower than A17. Intriguingly, in *AhWOX5* overexpressed  
347 *cre1* roots where symbiosis was perfectly restored the level of *MtRR4* increased by ~15-fold  
348 which was at least 3 fold more than the level of *MtRR4* in A17. In turanose treated *cre1* roots  
349 where symbiosis was partially restored the level of *MtRR4* just doubled. Level of *MtRR8* and  
350 *MtRR9* either significantly decreased or remained unchanged in both A17 and *cre1* in both  
351 turanose treated and *AhWOX5* overexpressed conditions indicating that they may not have

352 any role in restoration of symbiosis in *cre1* (Fig.4e-f). Finally, in tune to successful recovery  
353 of symbiosis in *cre1* in presence of turanose or overexpressed *AhWOX5*, the expression of  
354 symbiosis markers like *MtSYMREM*, *MtIPD3*, *MtNIN*, and *MtENOD40* was restored to the  
355 level of A17 under symbiotic conditions (Fig.4g-j).

356

## 357 **DISCUSSION**

358 The symbiotic inefficiency in *cre1* is due to its inability to induce flavonoids that regulate  
359 auxin transport for reactivation of cortical cells (Ng et al., 2015). In accordance, treatment  
360 with flavonoids allowed auxin transport control and rescued nodulation efficiency in *cre1*.  
361 Herein we demonstrate that (i) turanose significantly induces both cytokinin and auxin  
362 response in *cre1* and rescues symbiosis (Fig.1). While sugar signalling is known to control  
363 several distinct aspects of plant development our results for the first time show its role in  
364 nodule development. (ii) Turanose induced auxin response was significantly higher in *cre1* as  
365 compared to A17 indicating a cytokinin dependent link between sugar status and auxin  
366 response (Fig.2). This observation highlights an antagonistic interaction between CRE1  
367 mediated cytokinin signalling and sugar signalling as noted before (Moore et al., 2003).  
368 Finally, (iii) we show that turanose induces the expression of *WOX5*, a marker of meristem  
369 maintenance (Sarkar et al., 2007). Overexpression of this single homeodomain transcription  
370 factor could completely restore functional symbiosis in *cre1* without affecting the expression  
371 level of *MtHK2* & *MtHK3* (Fig.3-4), suggesting *WOX5* to function downstream to CRE1 as  
372 observed in SAM. These observations are summarised in a working model and discussed in  
373 the backdrop of our present understanding about cytokinin signalling during nodule initiation  
374 (Fig.5).

375 Sucrose metabolism is highly responsive to both internal and external environmental signals  
376 and can in turn dramatically alter plant development (Koch, 2004). In general, hexoses favor  
377 cell division and expansion, whereas sucrose favour differentiation and maturation (Å et al.,  
378 2003; Borisjuk et al., 2003). Several evidences indicate a connection between sucrose  
379 signalling and the conserved *WOX-CLV* regulatory system that are involved in meristem  
380 maintenance (Francis and Halford, 2006). The best example is the loss of *WOX9* mutant *stip*,  
381 that has SAM defects and arrests growth soon after germination. Remarkably, *stip* could be  
382 rescued by sucrose, and thus a gene that is typically required for normal meristem  
383 development was compensated by sugar signalling (Xuelin Wu, Tsagaye Dabi, 2005).

384 Additionally, cytokinins are required for *STIP* (WOX9) expression, linking cytokinin  
385 signalling to meristem establishment through the action of *STIP* (Skylar et al., 2010). Another  
386 example is FANTASTIC FOUR (FAF4) protein that control meristem size through WUS  
387 proteins. FAF4 overexpression arrests root growth shortly after germination and the  
388 aberration can be rescued by addition of exogenous sucrose (Wahl et al., 2010). Additional  
389 examples involve turanose-treated *Arabidopsis* seedlings that are characterized by short  
390 primary root. Turanose-insensitive mutant was a loss-of-function mutant of WOX5 and  
391 turanose insensitivity was associated with constitutive activation of IAA conjugation. This  
392 demonstrated a direct link with WOX signalling and sugar status and indicated WOX5 to be a  
393 positive trigger for free IAA availability (Gonzali et al., 2005). In summary, all these  
394 examples clearly demonstrate that sucrose signals overlap phytohormonal signals and their  
395 crosstalk is then directly sensed by the WOX group of transcription factors for regulating  
396 plant development. Herein, our observations demonstrate how turanose signalling induces  
397 auxin mediated WOX5 expression to recover a complex phenotype like root nodule  
398 symbiosis in a cytokinin receptor mutant, pointing to a deep conservation of signalling for  
399 developing and sustenance of meristems (Fig.1-2). We indicate this sugar and auxin mediated  
400 WOX5 expression to be functionally parallel to the MtCRE1 mediated signalling (Fig.5).

401 WOX genes are common regulators of cell proliferation and differentiation and are part of a  
402 subnetwork of cell fate-governing factors (Richards et al., 2015). The common mode of  
403 action for WOX proteins is prevention of premature differentiation by transcriptional  
404 repression that maintains the stem cell niche in meristems which is also conserved in the  
405 nodule meristem (Sarkar et al., 2007). The complete rescue of symbiosis in *cre1* by *AhWOX5*  
406 was intriguing because ectopic expression of WOX5, a mobile organizer signal that represses  
407 differentiation, was expected to maintain stemness and restrict organogenesis. It may be  
408 noted that overexpression of WOX5 had no effect on nodulation efficiency in A17 which  
409 again suggests that WOX5 is tightly controlled by the fate governing signalling network at  
410 post transcriptional level (Fig.5). We were further intrigued by the fact that *AhWOX5* from a  
411 determinate legume but not the intrinsic *MtWOX5* could restore symbiosis in *cre1* where the  
412 reverse was expected (Fig.3d). This sharp difference between *MtWOX5* and *AhWOX5* could  
413 be because they were differentially responsive to post transcriptional and post translational  
414 regulations. The indeterminate and determinate WOX5 were distinctly clustered in a distance  
415 tree (Supplementary fig.3) and one important difference between them was in the WUS box  
416 motif which is TLQLFP in *AhWOX5* and TLELFP in *MtWOX5*. Since WUS box is the major

417 determinant of biological action of WOX proteins and is essential for both activation and  
418 repression function of this transcription factor (Ikeda et al., 2009; Dolzblasz et al., 2016), the  
419 difference in charge in this motif could be a significant determinant of the contrasting  
420 outcome. In response to external cues WOX proteins transiently turn to activator mode for  
421 triggering differentiation during plant development (Forzani et al., 2014). To explain the  
422 sharp difference between *MtWOX5* and *AhWOX5* in their ability to restore symbiosis in *cre1*  
423 we hypothesize *MtWOX5* to be trapped in its default mode of repression whereas *AhWOX5*  
424 can override the control. Such differences between indeterminate and determinate WOX5  
425 may also have a role in determining the perpetual and terminated meristems in respective  
426 legumes.

427 The importance of auxin signalling in WOX5 mediated restoration of symbiotic efficiency in  
428 *cre1* (Fig.2) is in accordance with the following evidences: (i) Both in *Arabidopsis* as well as  
429 in *Medicago* auxin induces WOX5 expression in roots (Gonzali et al., 2005; Osipova et al.,  
430 2012). (ii) Induction of WOX5 by turanose results in repression of SUR2, a modulator of  
431 auxin homeostasis, resulting in a marked increase in free IAA content. (iii) WOX5 directly  
432 modulates expression of auxin biosynthetic genes and thus provides a robust mechanism for  
433 the maintenance of auxin response maximum (Tian et al., 2014). Thus, unlike flavonoids that  
434 regulate auxin gradients by affecting its transport, WOX5 expression regulate auxin response  
435 through its synthesis and conjugation. Recent evidence in recruitment of auxin biosynthesis  
436 gene YUCCA2 and YUCCA8 during nodule development further highlight the important role  
437 of auxin biosynthesis during nodule development (Schiessl et al., 2019). It may be noted that  
438 incidence of merged nodules which is an indication of higher auxin concentration was only  
439 noted in presence of turanose and not WOX5 overexpressed roots indicating WOX5  
440 expression to keep auxin under homeostatic control. The increased auxin response in *cre1* as  
441 compared to A17 highlighted the reciprocity in sugar and MtCRE1 signalling (Fig.2). Similar  
442 reciprocity between cytokinin and sugar signalling was noted earlier where plants with  
443 impaired cytokinin receptors CRE1 and AHK3 display increased sugar sensitivity and  
444 decreased sensitivity to sugar in HXK1 mutant was accompanied with increased cytokinin  
445 response (Moore et al., 2003; Franco-zorrilla et al., 2005). It is apparent that a bidirectional  
446 antagonistic interaction operates between sugars and CRE1 mediated cytokinin signalling in  
447 generating auxin response (Fig.5).

448 The point is how MtCRE1 dependent cytokinin signalling is compensated by turanose  
449 mediated WOX5 expression in *cre1*. The late and inefficient nodule development in *cre1* is

450 due to the redundant involvement of receptors MtHK2 and MtHK3 (Held et al., 2014; Boivin  
451 et al., 2016). In presence of turanose there was a significant upregulation of *MtHK2* which  
452 can serve as a proxy for CRE1 and explain the rescue of symbiosis in *cre1* (Fig.4). On the  
453 other hand, *AhWOX5* overexpression did not affect the expression of any of the HKs in A17  
454 as well as *cre1* indicating the mechanism of WOX5 mediated restoration of symbiosis in *cre1*  
455 to be certainly downstream. WOX proteins has been shown to directly repress the  
456 transcription of several Type-A RRs genes, which encode negative regulators of cytokinin  
457 signalling (Zhao et al., 2009). We found *MtRR8* to be repressed and *MtRR9* to be unaffected  
458 in presence of turanose as well as *AhWOX5* (Fig.4). Intriguingly, we found that expression of  
459 *MtRR4* that gets induced in presence of rhizobia (Plet et al., 2011) was doubled in presence of  
460 turanose in both A17 and *cre1* and its expression was ~12 times more in presence of  
461 *AhWOX5* in *cre1* roots. The increased expression of *MtRR4* may serve as a proxy for  
462 cytokinin signalling in *cre1* for developing symbiosis (Fig.5). Again, in contrast to negative  
463 activity of several of the type-A ARR, ARR4 has also been shown to have positive  
464 interactions (To et al., 2007). Since the efficacy of restoration of symbiosis with *AhWOX5*  
465 expression is much higher than what we observed with turanose we presume the pathway of  
466 restoration by *AhWOX5* to evade all upstream feed-back homeostatic loops (Fig.4).

467 In a working model (Fig.5) we propose sugar signalling to restore symbiosis in *cre1* by (i)  
468 redundant action of MtHK2 that compensates MtCRE1 and by (ii) directly triggering auxin  
469 responses (Blue arrows). *AhWOX5* do not trigger *MtHK2/3* expression and is proposed to  
470 restore symbiosis by induction of (i) *MtRR4* a response regulator required for symbiosis and  
471 by directly triggering auxin responses (Red arrows). Since overexpression of WOX5 do not  
472 trigger cortical cell division in *cre1*, the trigger of SYM pathway is essential for WOX5  
473 action. Also, since overexpression of *AhWOX5* has no effect on nodule organogenesis in  
474 A17, WOX5 function appear to be governed by post transcriptional homeostatic controls.  
475 This layout can now serve as model for understanding the role of sugar signalling mediated  
476 auxin response in RNS and help elucidate the regulation of indeterminate and a determinate  
477 WOX5.

478

## 479 **MATERIALS AND METHODS**

### 480 **Plant and Rhizobial strains**

481 *Medicago cre1* seeds (Plet et al., 2011), *Agrobacterium rhizogenes* strain MSU440 and  
482 *Sinorhizobium meliloti Sm2011-pBHR-mRFP* and *Sm1021-pXLGD4-lacZ* (Boivin et al., 1990)  
483 strain were used.

#### 484 **Constructs**

485 Full length MtWOX5 and AhWOX5 are amplified from cDNA prepared from nodulated  
486 roots of *Medicago truncatula* and *Arachis hypogaea* (Kundu and DASGupta, 2018) with  
487 primers 5'-ATGGAAGAGAGCATGTCAGG-3' and 5'-  
488 ACTTACGGTTGAGTTTTGTGTAA-3' (*MtWOX5*) 5'-  
489 CACCATGCAGACGGTCCGAGATCTGTC-3' and 5'-  
490 CCTTCGCTTAAGTTTCATGTAA-3' (*AhWOX5*) and cloned into pENTER-dTOPO  
491 (Invitrogen). The entry clones are recombined through LR clonase Gateway technology  
492 (Invitrogen) into pK7WGF2 to generate 35S::eGFP-MtWOX5 and 35S::eGFP-AhWOX5.  
493 pDR5:GUS, pWOX5:GUS and pTCS:GUS were obtained from (Franssen et al., 2015).

#### 494 **Turanose treatment**

495 Plants are germinated as previously described Saha et. al.,2014 followed by their transfer into  
496 Fahraeus medium containing different concentration of Turanose:  $10^{-3}$ M and  $10^{-2}$ M. For  
497 promoter assay plants are maintained for 2-3 weeks in Turanose plates before harvesting and  
498 staining. For nodulation assay plants are inoculated in the plates with *Sm2011-pBHR-mRFP*/  
499 *Sm1021-pXLGD4-lacZ* grown overnight at 28°C in YM to OD600=1.0 and then diluted 1:50  
500 in half-strength B&D (Broughton and Dilworth, 1971). Nodulation is scored 3-4WAI.

#### 501 **Phenotypic analysis**

502 Generation of composite *M. truncatula* plants and scoring nodulation, phenotypic analysis  
503 and confocal microscopy were performed as described previously (Saha et al., 2014).  
504 For detailed description of methods pertaining to growth condition, phenotypic assay,  
505 microscopy, qRT-PCR and primers used see Supplemental Methods S1.

506

#### 507 **ACKNOWLEDGEMENT**

508 We thank Florian Frugier for *cre1* seeds, Henk J. Franssen for providing us with *pDR:GUS*,  
509 *pTCS:GUS* and *pWOX5:GUS* constructs, Ton Bisseling & Erik Limpens for *S. meliloti*  
510 harbouring *pBHR-mRFP*, Douglas R. Cook for *Agrobacterium* strain MSU440.



511

## 512 SUPPLEMENTAL DATA

### 513 Supplementary Materials and Methods

514 **Supplementary Table 1:** List of qRT-PCR primers

515 **Supplementary figure 1:** Root morphology of A17 and *cre1* under different concentration of  
516 Turanose

517 **Supplementary figure 2:** Relative expression of *MtWOX5* after turanose treatment

518 **Supplementary figure 3:** Sequence alignment and phylogenetic tree of legume WOX5

519

## 520 FIGURE LEGENDS

521

522 **Figure 1: Complementation of nodulation in *cre1* mutants using non-metabolizable**  
523 **sucrose analogue Turanose.** (A) Box plot represents nodule number per plant where  
524 histogram represent mean  $\pm$  SD. Separate plots indicates cumulative and red/white nodules 3-  
525 4 weeks after infection (WAI) with *Sinorhizobium meliloti Sm2011-pBHR-mRFP* under  
526 control and  $10^{-3}$ M turanose treatment. Student's t-test was used to assess significant  
527 differences, where \*\*\*\* and \* indicate  $P < 0.0001$  and  $< 0.01$  respectively, n indicates the  
528 number of roots systems with infection events per total number of scored roots.

529 (B) Morphology of nodules in A17 and *cre1* mutants 3-4WAI. Representative micrograph of  
530 control and turanose treated roots indicated as bright field and bright field+ mRFP merged.

531 (C) Ultrastructure analysis of nodules in A17 and *cre1* after turanose treatment, where the  
532 perforated box represents the infection zone with its corresponding enlarged view below the  
533 respective images. Total number of each type of nodules observed out of the total observed  
534 nodules are indicated at the left-hand corner. (upper panel) Brightfield + mRFP merged and  
535 (lower panel) mRFP. Scale bar: B= 500 $\mu$ m, C (upper panel) = 100 $\mu$ m and (lower panel) =  
536 10 $\mu$ m.

537

538 **Figure 2: Turanose treatment and infection with *Sm2011-pBHR-mRFP* differentially**  
539 **induces cytokinin (*pTCS:GUS*), auxin (*pDR5:GUS*) and WOX5 (*pWOX5:GUS*)**  
540 **expression in A17 and *cre1* mutants.** (A-F) *pTCS:GUS* expression in (A-C) A17 roots  
541 under control (A),  $10^{-3}$ M Turanose treatment (B) and after *Sm2011* infection (C); (D-F) *cre1*  
542 roots under control (D),  $10^{-3}$ M Turanose treatment (E) and after *Sm2011* infection (F).

543 (G-L) *pDR5:GUS* expression in (G-I) A17 roots under control (G),  $10^{-3}$ M Turanose treatment  
544 (H) and after *Sm2011* infection (I); (J-L) *cre1* roots under control (J),  $10^{-3}$ M Turanose  
545 treatment (K) and after *Sm2011* infection (L).

546 (M-R) *pWOX5:GUS* expression in (M-O) A17 roots under control (M),  $10^{-3}$ M Turanose  
547 treatment (N) and after *Sm2011* infection (O); in (P-R) *cre1* roots under control (P),  $10^{-3}$ M  
548 Turanose treatment (Q) and after *Sm2011* infection.

549 Root were harvested 1 week post treatment with turanose and 1 week after infection with  
550 *Sm2011-pBHR-mRFP*. At least 20 individual samples were observed for each treatment and  
551 representative images are presented. Scale bar = 5mm (whole root) and 2mm (single root).

552

553 **Figure 3: Complementation of nodulation in hairy-root transformed *cre1* mutants by**  
554 **ectopic expression of *AhWOX5*.** (A) Epidermal infection thread (IT) observed under bright  
555 field microscope 2WAI with *Sm1021-pXLGD4-lacZ* in *cre1* roots transformed with empty  
556 vector, *p35S:eGFP-MtWOX5* and *p35S:eGFP-AhWOX5*. Total number of each type of  
557 infection threads (IT) observed out of the total number of early infection events are indicated  
558 at the left-hand corner. Scale bar = 100 $\mu$ m.

559 Box plot represents (B) IT/ root system and (C) Nodule number/ root system where histogram  
560 represent mean  $\pm$  SD. Student's t-test was used to assess significant differences, where \*\*\*\*  
561 and \*\* indicates  $P < 0.0001$  and  $P < 0.004$  respectively and n indicates the number of roots  
562 systems with infection events per total number of scored roots.

563 (D) Morphology of nodules in transgenic hairy-roots of *cre1* mutant 4WAI with *Sm2011-*  
564 *pBHR-mRFP*. Representative micrograph of transgenic roots indicated as bright field+ mRFP  
565 merged and inset as eGFP+ mRFP merged and bright field. Scale bar = 1mm and inset =  
566 500 $\mu$ m.

567 (E) qRT-PCR analysis of *MtWOX5* and *AhWOX5* relative to control transformed (*cre1*) roots  
568 normalised against *MtActin*. (F) Acetylene reduction assay (nmole  $C_2H_4$ /h/mg nodule) in  
569 indicated root system. For E and F, Histogram represents an average of three biological  
570 replicates each having  $n > 4$  plants and error bar represents SD. Student's t- test was used to  
571 assess significant differences, where \*\*\*\* indicate  $P < 0.0001$ .

572 (G) Ultrastructure of nodules developed in *cre1* mutant transformed with different constructs  
573 where the perforated box represents the infection zone with its corresponding enlarged view  
574 below the respective images. Scale bar: G (upper panel) = 100 $\mu$ m and (lower panel) = 10 $\mu$ m.  
575 Arrow indicate infection thread and \* indicate cell division.

576

577 **Figure 4: Differential recruitment of cytokinin signalling and sym pathway during the**  
578 **complementation of *cre1* mutant under turanose treatment and *AhWOX5* ectopic**  
579 **expression.** qRT-PCR analysis of *MtCRE1* (A), *MtHK2* (B), *MtHK3* (C), *MtRR4* (D), *MtRR8*  
580 (E) *MtRR9* (F) *MtSYMREM* (G), *MtIPD3* (H), *MtNIN* (I) and *MtENOD40* (J) 4WAI with  
581 *Sm2011-pBHR-mRFP* in roots of A17, A17/Turanose, A17::35S:*AhWOX5*, *cre1*,  
582 *cre1*/Turanose and *cre1*::35S:*AhWOX5* relative to A17. *MtActin* was used as a reference  
583 gene. Histogram represents an average of three biological replicates each having n>4 plants  
584 and error bar represents SD. Student's t-test was used to assess significant differences where  
585 \*\*\*\*, \*\*\*, \*\* and \* indicate P<0.0001, 0.0001, 0.005 and 0.04 respectively.

586

587 **Figure 5: Proposed Model for the role of sugar signalling and *WOX5* expression in**  
588 **restoration of symbiotic efficiency in *M. truncatula* cytokinin perception mutant *cre1*.**  
589 Black arrows indicate the known sym pathway dependent CRE1 activation that leads to auxin  
590 accumulation and WOX5 induction to generate the nodule primordia. We propose sugar  
591 signalling to restore symbiosis in *cre1* by (i) redundant action of MtHK2 that compensates  
592 MtCRE1 and by (ii) directly triggering auxin responses that is inhibited by CRE1 (Blue  
593 arrows). WOX5 restore symbiosis in *cre1* by induction of (i) *MtRR4* a response regulator  
594 required for symbiosis and by directly triggering auxin responses). WOX5 is activated by  
595 SYM pathway and its function is governed by post transcriptional homeostatic controls (Red  
596 arrows). Forward arrow indicates activation and blunt arrow indicates inactivation.

597

598

599

600

## 601 REFERENCES

602

603 **Ã WW, Panitz R, Gubatz S, Wang Q, Radchuk R, Weber H, Wobus U** (2003) Weschke  
604 2003 - Invertase and transporter control sugar rate during development - protocol  
605 dna.pdf. 395–411

606 **Ayre BG** (2011) Membrane-transport systems for sucrose in relation to whole-plant carbon  
607 partitioning. *Mol Plant* **4**: 377–394

608 **Boivin C, Camut S, Malpica CA, Truchet G, Rosenberg C** (1990) Rhízobíum me/í/otí. 2:

- 609 **Boivin S, Kazmierczak T, Brault M, Wen J, Gamas P, Mysore KS, Frugier F** (2016)  
610 Different cytokinin histidine kinase receptors regulate nodule initiation as well as later  
611 nodule developmental stages in *Medicago truncatula*. *Plant Cell Environ* **39**: 2198–2209
- 612 **Borisjuk L, Rolletschek H, Wobus U, Weber H** (2003) Differentiation of legume  
613 cotyledons as related to metabolic gradients and assimilate transport into seeds. *J Exp*  
614 *Bot* **54**: 503–512
- 615 **Breakspear A, Liu C, Roy S, Stacey N, Rogers C, Trick M, Morieri G, Mysore KS, Wen**  
616 **J, Oldroyd GED, et al** (2014) The root hair “infectome” of *medicago truncatula*  
617 uncovers changes in cell cycle genes and reveals a requirement for auxin signaling in  
618 rhizobial infectionw. *Plant Cell* **26**: 4680–4701
- 619 **Broughton WJ, Dilworth MJ** (1971) Control of leghaemoglobin synthesis in snake beans.  
620 *Biochem J* **125**: 1075–1080
- 621 **Chen SK, Kurdyukov S, Kereszt A, Wang XD, Gresshoff PM, Rose RJ** (2009) The  
622 association of homeobox gene expression with stem cell formation and morphogenesis  
623 in cultured *medicago truncatula*. *Planta* **230**: 827–840
- 624 **Dolzblasz A, Nardmann J, Clerici E, Causier B, van der Graaff E, Chen J, Davies B,**  
625 **Werr W, Laux T** (2016) Stem Cell Regulation by Arabidopsis WOX Genes. *Mol Plant*  
626 **9**: 1028–1039
- 627 **Forzani C, Aichinger E, Sornay E, Willemssen V, Laux T, Dewitte W, Murray JAH**  
628 (2014) WOX5 suppresses CYCLIN D activity to establish quiescence at the Center of  
629 the root stem cell niche. *Curr Biol* **24**: 1939–1944
- 630 **Francis D, Halford NG** (2006) Nutrient sensing in plant meristems. *Plant Mol Biol* **60**: 981–  
631 993
- 632 **Franco-zorrilla M, Marti AC, Leyva A, Paz-ares J** (2005) Interaction between Phosphate-  
633 Starvation, Sugar, and Cytokinin Signaling in Arabidopsis and the Roles of Cytokinin  
634 Receptors CRE1/AHK4 and AHK3. **138**: 847–857
- 635 **Franssen HJ, Xiao TT, Kulikova O, Wan X, Bisseling T, Scheres B, Heidstra R** (2015)  
636 Root developmental programs shape the *Medicago truncatula* nodule meristem. *Dev*  
637 **142**: 2941–2950
- 638 **Frugier F, Kosuta S, Murray JD, Crespi M, Szczyglowski K** (2008) Cytokinin: secret

- 639 agent of symbiosis. *Trends Plant Sci* **13**: 115–120
- 640 **Gonzalez-Rizzo S, Crespi M, Frugier F** (2006) The *Medicago truncatula* CRE1 cytokinin  
641 receptor regulates lateral root development and early symbiotic interaction with  
642 *Sinorhizobium meliloti*. *Plant Cell* **18**: 2680–2693
- 643 **Gonzali S, Novi G, Loreti E, Paolicchi F, Poggi A, Alpi A, Perata P** (2005) A turanose-  
644 insensitive mutant suggests a role for WOX5 in auxin homeostasis in *Arabidopsis*  
645 *thaliana*. *Plant J* **44**: 633–645
- 646 **Held M, Hou H, Miri M, Huynh C, Ross L, Hossain MS, Sato S, Tabata S, Perry J,**  
647 **Wang TL, et al** (2014) *Lotus japonicus* cytokinin receptors work partially redundantly  
648 to mediate nodule formation. *Plant Cell* **26**: 678–694
- 649 **Ikeda M, Mitsuda N, Ohme-Takagi M** (2009) *Arabidopsis wuschel* is a bifunctional  
650 transcription factor that acts as a repressor in stem cell regulation and as an activator in  
651 floral patterning. *Plant Cell* **21**: 3493–3505
- 652 **Dello Ioio R, Nakamura K, Moubayidin L, Perilli S, Taniguchi M, Morita MT, Aoyama**  
653 **T, Costantino P, Sabatini S** (2008) A genetic framework for the control of cell division  
654 and differentiation in the root meristem. *Science* (80- ) **322**: 1380–1384
- 655 **Jones B, Ljung K, Gunnerås SA, Petersson S V., Tarkowski P, Graham N, May S,**  
656 **Dolezal K, Sandberg G** (2010) Cytokinin regulation of auxin synthesis in *Arabidopsis*  
657 involves a homeostatic feedback loop regulated via auxin and cytokinin signal  
658 transduction. *Plant Cell* **22**: 2956–2969
- 659 **Koch K** (2004) Sucrose metabolism: Regulatory mechanisms and pivotal roles in sugar  
660 sensing and plant development. *Curr Opin Plant Biol* **7**: 235–246
- 661 **Kundu A, DASGupta M** (2018) Silencing of putative cytokinin receptor histidine kinase  
662 inhibits both inception and differentiation of root nodules in *arachis hypogaea*. *Mol*  
663 *Plant-Microbe Interact* **31**: 187–199
- 664 **Lalonde S, Wipf D, Frommer WB** (2004) Transport Mechanisms for Organic Forms of  
665 Carbon and Nitrogen Between Source and Sink. *Annu Rev Plant Biol* **55**: 341–372
- 666 **Leclere S, Schmelz EA, Chourey PS** (2010) Sugar levels regulate tryptophan-dependent  
667 auxin biosynthesis in developing maize kernels. *Plant Physiol* **153**: 306–318

- 668 **Ljung K, Nemhauser JL, Perata P** (2015) New mechanistic links between sugar and  
669 hormone signalling networks. *Curr Opin Plant Biol* **25**: 130–137
- 670 **Madsen LH, Tirichine L, Jurkiewicz A, Sullivan JT, Heckmann AB, Bek AS, Ronson**  
671 **CW, James EK, Stougaard J** (2010) The molecular network governing nodule  
672 organogenesis and infection in the model legume *Lotus japonicus*. *Nat Commun*. doi:  
673 10.1038/ncomms1009
- 674 **Mathesius U, Weinman JJ, Rolfe BG, Djordjevic MA** (2000) Rhizobia can induce nodules  
675 in white clover by “hijacking” mature cortical cells activated during lateral root  
676 development. *Mol Plant-Microbe Interact* **13**: 170–182
- 677 **Miri M, Janakirama P, Held M, Ross L, Szczyglowski K** (2016) Into the Root: How  
678 Cytokinin Controls Rhizobial Infection. *Trends Plant Sci* **21**: 178–186
- 679 **Mishra BS, Singh M, Aggrawal P, Laxmi A** (2009) Glucose and auxin signaling interaction  
680 in controlling *Arabidopsis thaliana* seedlings root growth and development. *PLoS One*.  
681 doi: 10.1371/journal.pone.0004502
- 682 **Moore B, Zhou L, Rolland F, Hall Q, Cheng WH, Liu YX, Hwang I, Jones T, Sheen J**  
683 (2003) Role of the *Arabidopsis* glucose sensor HXK1 in nutrient, light, and hormonal  
684 signaling. *Science* (80- ) **300**: 332–336
- 685 **Moubayidin L, Perilli S, Dello Ioio R, Di Mambro R, Costantino P, Sabatini S** (2010)  
686 The rate of cell differentiation controls the *Arabidopsis* root meristem growth phase. *Curr*  
687 *Biol* **20**: 1138–1143
- 688 **Ng JLP, Hassan S, Truong TT, Hocart CH, Laffont C, Frugier F, Mathesius U** (2015)  
689 Flavonoids and auxin transport inhibitors rescue symbiotic nodulation in the *Medicago*  
690 *truncatula* cytokinin perception mutant *cre1*. *Plant Cell*. doi: 10.1105/tpc.15.00231
- 691 **Ng JLP, Mathesius U** (2018) Acropetal auxin transport inhibition is involved in  
692 indeterminate but not determinate nodule formation. *Front Plant Sci* **9**: 1–13
- 693 **Van Noorden GE, Ross JJ, Reid JB, Rolfe BG, Mathesius U** (2006) Defective long-  
694 distance auxin transport regulation in the *Medicago truncatula* super numeric nodules  
695 mutant. *Plant Physiol* **140**: 1494–1506
- 696 **Ohto MA, Hayashi S, Sawa S, Hashimoto-Ohta A, Nakamura K** (2006) Involvement of  
697 HLS1 in sugar and auxin signaling in *Arabidopsis* leaves. *Plant Cell Physiol* **47**: 1603–

698 1611

- 699 **Op den Camp RHM, de Mita S, Lillo A, Cao Q, Limpens E, Bisseling T, Geurts R**  
700 (2011) A phylogenetic strategy based on a legume-specific whole genome duplication  
701 yields symbiotic cytokinin type-A response regulators. *Plant Physiol* **157**: 2013–2022
- 702 **Osipova MA, Mortier V, Demchenko KN, Tsyganov VE, Tikhonovich IA, Lutova LA,**  
703 **Dolgikh EA, Goormachtig S** (2012) WUSCHEL-RELATED HOMEODOMAIN5 gene  
704 expression and interaction of cle peptides with components of the systemic control add  
705 two pieces to the puzzle of autoregulation of nodulation. *Plant Physiol* **158**: 1329–1341
- 706 **Pernisová M, Klíma P, Horák J, Válková M, Malbeck J, Souček P, Reichman P,**  
707 **Hoyerová K, Dubová J, Friml J, et al** (2009) Cytokinins modulate auxin-induced  
708 organogenesis in plants via regulation of the auxin efflux. *Proc Natl Acad Sci U S A*  
709 **106**: 3609–3614
- 710 **Plet J, Wasson A, Ariel F, Le Signor C, Baker D, Mathesius U, Crespi M, Frugier F**  
711 (2011) MtCRE1-dependent cytokinin signaling integrates bacterial and plant cues to  
712 coordinate symbiotic nodule organogenesis in *Medicago truncatula*. *Plant J* **65**: 622–633
- 713 **Reid DE, Heckmann AB, Novák O, Kelly S, Stougaard J** (2016) CYTOKININ  
714 OXIDASE/DEHYDROGENASE3 maintains cytokinin homeostasis during root and  
715 nodule development in *Lotus Japonicus*. *Plant Physiol* **170**: 1060–1074
- 716 **Richards S, Wink RH, Simon R** (2015) Mathematical modelling of WOX5-and CLE40-  
717 mediated columella stem cell homeostasis in *Arabidopsis*. *J Exp Bot* **66**: 5375–5384
- 718 **Rightmyer AP, Long SR** (2011) Pseudonodule formation by wild-type and symbiotic  
719 mutant *Medicago truncatula* in response to auxin transport inhibitors. *Mol Plant-*  
720 *Microbe Interact* **24**: 1372–1384
- 721 **Saha S, Dutta A, Bhattacharya A, DasGupta M** (2014) Intracellular catalytic domain of  
722 symbiosis receptor kinase hyperactivates spontaneous nodulation in absence of rhizobia.  
723 *Plant Physiol* **166**: 1699–1708
- 724 **Sairanen I, Novák O, Pěňčík A, Ikeda Y, Jones B, Sandberg G, Ljung K** (2013) Soluble  
725 carbohydrates regulate auxin biosynthesis via PIF proteins in *arabidopsis*. *Plant Cell* **24**:  
726 4907–4916
- 727 **Sarkar AK, Luijten M, Miyashima S, Lenhard M, Hashimoto T, Nakajima K, Scheres**

- 728 **B, Heidstra R, Laux T** (2007) Conserved factors regulate signalling in Arabidopsis  
729 thaliana shoot and root stem cell organizers. *Nature* **446**: 811–814
- 730 **Schiessl K, Lilley JLS, Lee T, Ahnert S, Grieneisen VA, Oldroyd GED, Schiessl K,**  
731 **Lilley JLS, Lee T, Tamvakis I, et al** (2019) Article NODULE INCEPTION Recruits  
732 the Lateral Root Developmental Program for Symbiotic Nodule Organogenesis in  
733 *Medicago truncatula* Article NODULE INCEPTION Recruits the Lateral Root  
734 Developmental Program for Symbiotic Nodule Organogenesis in *Medicago trun.* *Curr*  
735 *Biol* 1–12
- 736 **Schnabel E, Journet EP, De Carvalho-Niebel F, Duc G, Frugoli J** (2005) The *Medicago*  
737 *truncatula* SUNN gene encodes a CLV1-like leucine-rich repeat receptor kinase that  
738 regulates nodule number and root length. *Plant Mol Biol* **58**: 809–822
- 739 **Sinha AK, Hofmann MG, Römer U, Köckenberger W, Elling L, Roitsch T** (2002)  
740 Metabolizable and non-metabolizable sugars activate different signal transduction  
741 pathways in tomato. *Plant Physiol* **128**: 1480–1489
- 742 **Skylar A, Hong F, Chory J, Weigel D, Wu X** (2010) STIMPY mediates cytokinin signaling  
743 during shoot meristem establishment in Arabidopsis seedlings. *Development* **137**: 541–  
744 549
- 745 **Stokes ME, Chattopadhyay A, Wilkins O, Nambara E, Campbell MM** (2013) Interplay  
746 between sucrose and folate modulates auxin signaling in Arabidopsis. *Plant Physiol* **162**:  
747 1552–1565
- 748 **Suzaki T, Yano K, Ito M, Umehara Y, Sukanuma N, Kawaguchi M** (2012) Positive and  
749 negative regulation of cortical cell division during root nodule development in *Lotus*  
750 *japonicus* is accompanied by auxin response. *Dev* **139**: 3997–4006
- 751 **Tian H, Wabnik K, Niu T, Li H, Yu Q, Pollmann S, Vanneste S, Govaerts W, Rolčík J,**  
752 **Geisler M, et al** (2014) WOXS-IAA17 feedback circuit-mediated cellular auxin  
753 response is crucial for the patterning of root stem cell niches in arabidopsis. *Mol Plant* **7**:  
754 277–289
- 755 **Tirichine L, Sandal N, Madsen LH, Radutoiu S, Albrektsen AS, Sato S, Asamizu E,**  
756 **Tabata S, Stougaard J** (2007) A gain-of-function mutation in a cytokinin receptor  
757 triggers spontaneous root nodule organogenesis. *Science* (80- ) **315**: 104–107



758 **To JPC, Deruère J, Maxwell BB, Morris VF, Hutchison CE, Ferreira FJ, Schaller GE,**  
759 **Kieber JJ** (2007) Cytokinin regulates type-A Arabidopsis response regulator activity  
760 and protein stability via two-component phosphorelay. *Plant Cell* **19**: 3901–3914

761 **Wahl V, Brand LH, Guo YL, Schmid M** (2010) The FANTASTIC FOUR proteins  
762 influence shoot meristem size in Arabidopsis thaliana. *BMC Plant Biol.* doi:  
763 10.1186/1471-2229-10-285

764 **Wingler A, Fritzius T, Wiemken A, Boller T, Aeschbacher RA** (2000) Trehalose induces  
765 the ADP-glucose pyrophosphorylase gene, ApL3, and starch synthesis in Arabidopsis.  
766 *Plant Physiol* **124**: 105–114

767 **Xuelin Wu, Tsagaye Dabi DW** (2005) Requirement of Homeobox Gene STIMPY/WOX9  
768 for Arabidopsis Meristem Growth and Maintenance. *Curr Biol* **15**: 436–440

769 **Van Zeijl A, Op Den Camp RHM, Deinum EE, Charnikhova T, Franssen H, Op Den**  
770 **Camp HJM, Bouwmeester H, Kohlen W, Bisseling T, Geurts R** (2015) Rhizobium  
771 Lipo-chitooligosaccharide Signaling Triggers Accumulation of Cytokinins in *Medicago*  
772 *truncatula* Roots. *Mol Plant* **8**: 1213–1226

773 **Zhao Y, Hu Y, Dai M, Huang L, Zhou DX** (2009) The WUSCHEL-Related homeobox  
774 gene WOX11 is required to activate shoot-borne crown root development in rice. *Plant*  
775 *Cell* **21**: 736–748

776

777

778

779

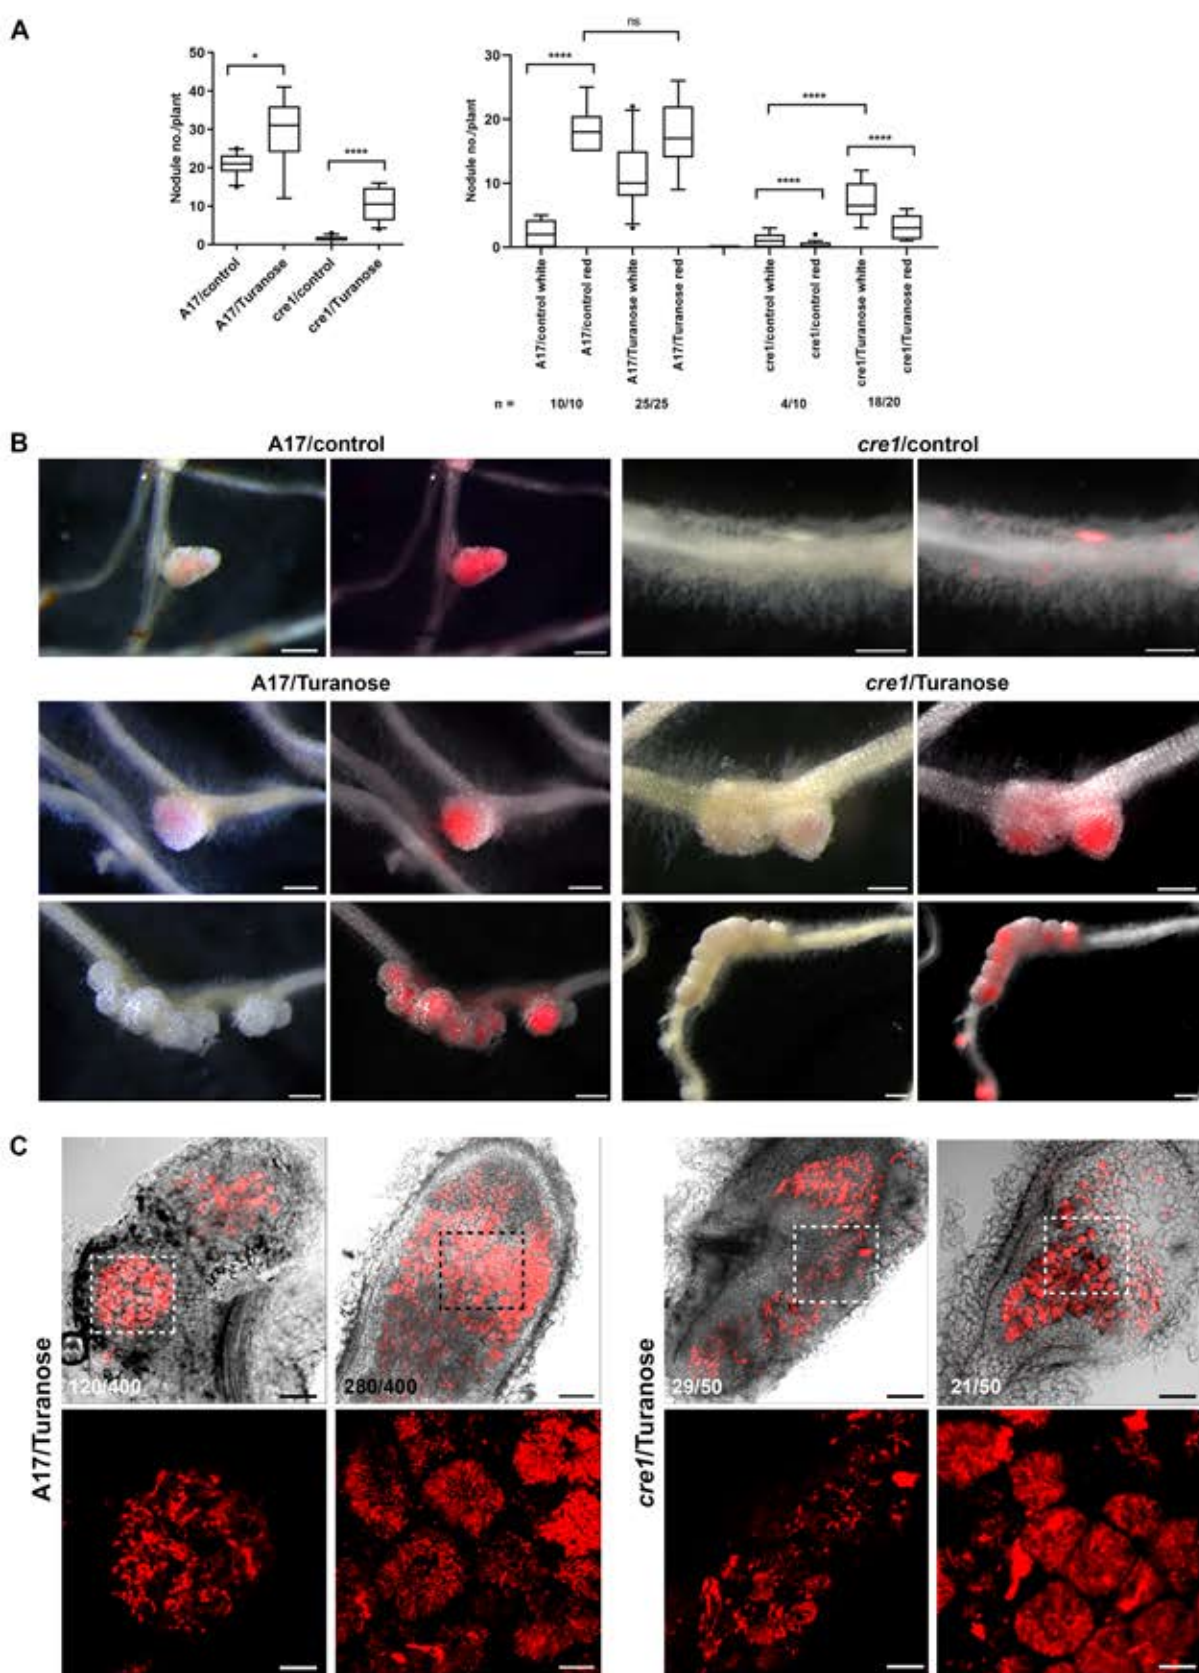

**Figure 1: Complementation of nodulation in *cre1* mutants using non-metabolizable sucrose analogue Turanose.** (A) Box plot represents nodule number per plant where histogram represent mean  $\pm$  SD. Separate plots indicates cumulative and red/white nodules 3-4 weeks after infection (WAI) with *Sinorhizobium meliloti* Sm2011-pBHR-mRFP under control and  $10^{-3}$ M turanose treatment. Student's t-test was used to assess significant differences, where \*\*\*\* and \* indicate  $P < 0.0001$  and  $< 0.01$  respectively, n indicates the number of roots systems with infection events per total number of scored roots. (B) Morphology of nodules in A17 and *cre1* mutants 3-4WAI. Representative micrograph of control and turanose treated roots indicated as bright field and bright field+ mRFP merged. (C) Ultrastructure analysis of nodules in A17 and *cre1* after turanose treatment, where the perforated box represents the infection zone with its corresponding enlarged view below the respective images. Total number of each type of nodules observed out of the total observed nodules are indicated at the left-hand corner. (upper panel) Brightfield + mRFP merged and (lower panel) mRFP. Scale bar: B= 500 $\mu$ m, C (upper panel) = 100 $\mu$ m and (lower panel) = 10 $\mu$ m.

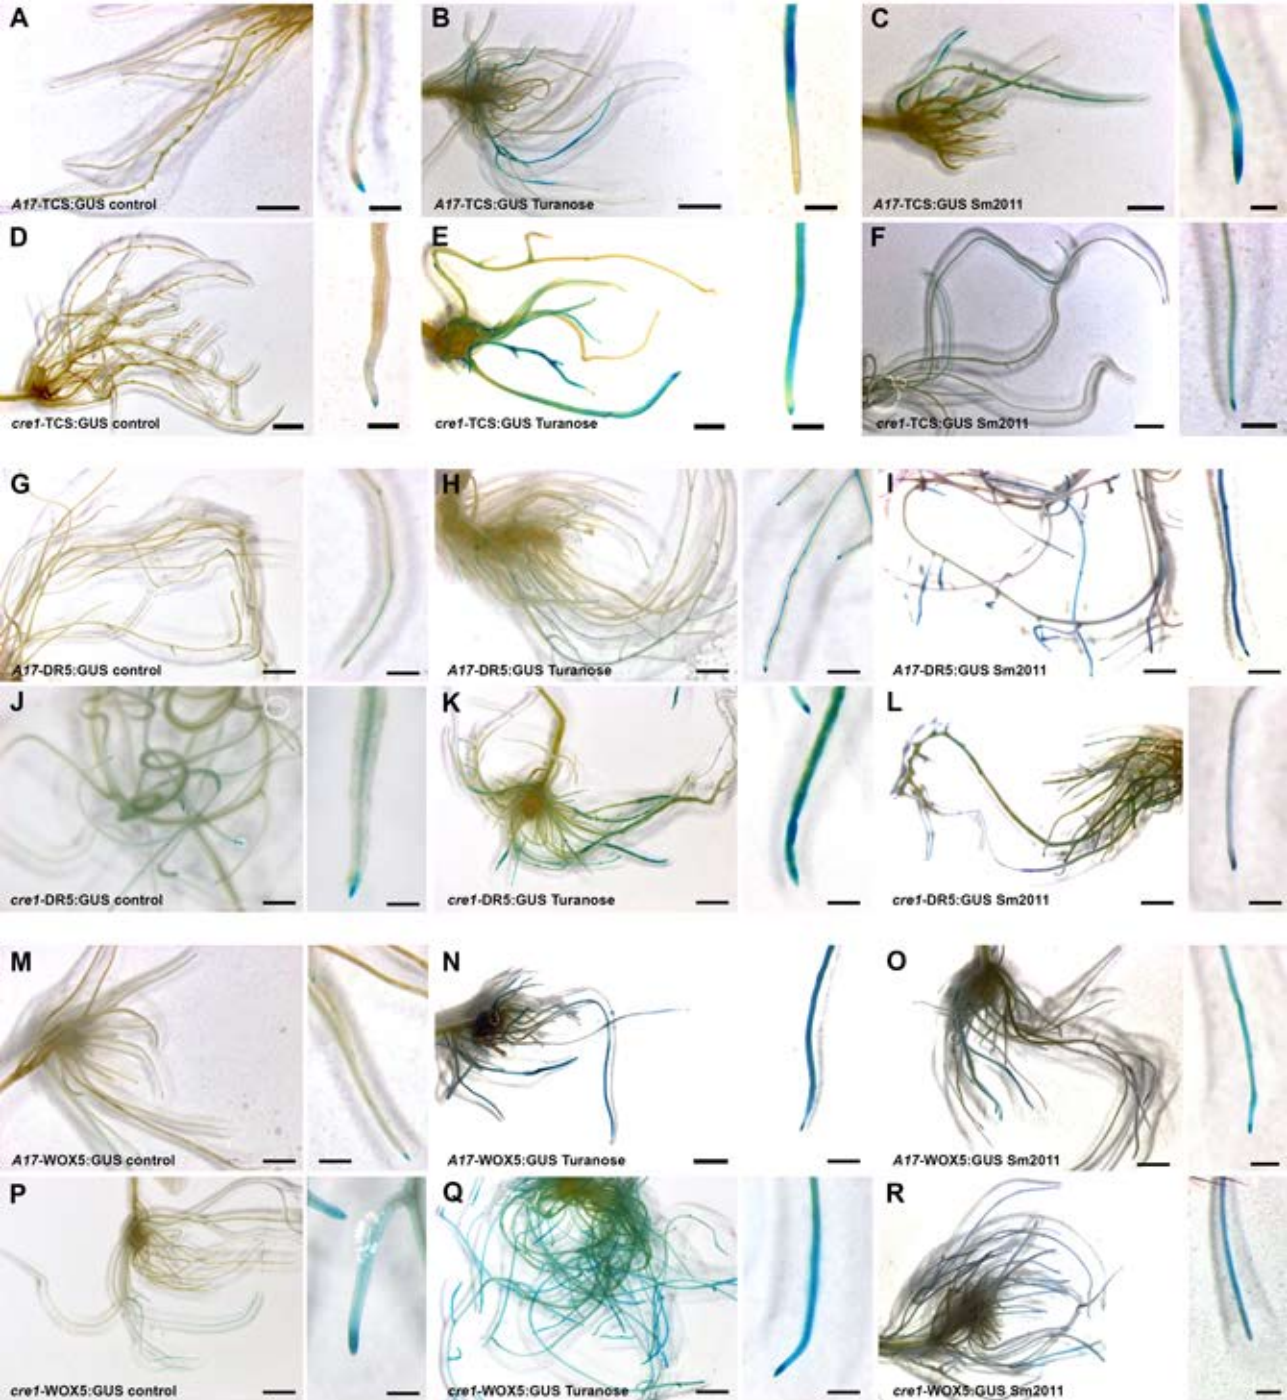

**Figure 2: Turanose treatment and infection with *Sm2011-pBHR-mRFP* differentially induces cytokinin (*pTCS:GUS*), auxin (*pDR5:GUS*) and *WOX5* (*pWOX5:GUS*) expression in A17 and *cre1* mutants.** (A-F) *pTCS:GUS* expression in (A-C) A17 roots under control (A),  $10^{-3}$ M Turanose treatment (B) and after *Sm2011* infection (C); (D-F) *cre1* roots under control (D),  $10^{-3}$ M Turanose treatment (E) and after *Sm2011* infection (F).

(G-L) *pDR5:GUS* expression in (G-I) A17 roots under control (G),  $10^{-3}$ M Turanose treatment (H) and after *Sm2011* infection (I); (J-L) *cre1* roots under control (J),  $10^{-3}$ M Turanose treatment (K) and after *Sm2011* infection (L).

(M-R) *pWOX5:GUS* expression in (M-O) A17 roots under control (M),  $10^{-3}$ M Turanose treatment (N) and after *Sm2011* infection (O); in (P-R) *cre1* roots under control (P),  $10^{-3}$ M Turanose treatment (Q) and after *Sm2011* infection.

Root were harvested 1 week post treatment with turanose and 1 week after infection with *Sm2011-pBHR-mRFP*. At least 20 individual samples were observed for each treatment and representative images are presented. Scale bar = 5mm (whole root) and 2mm (single root).

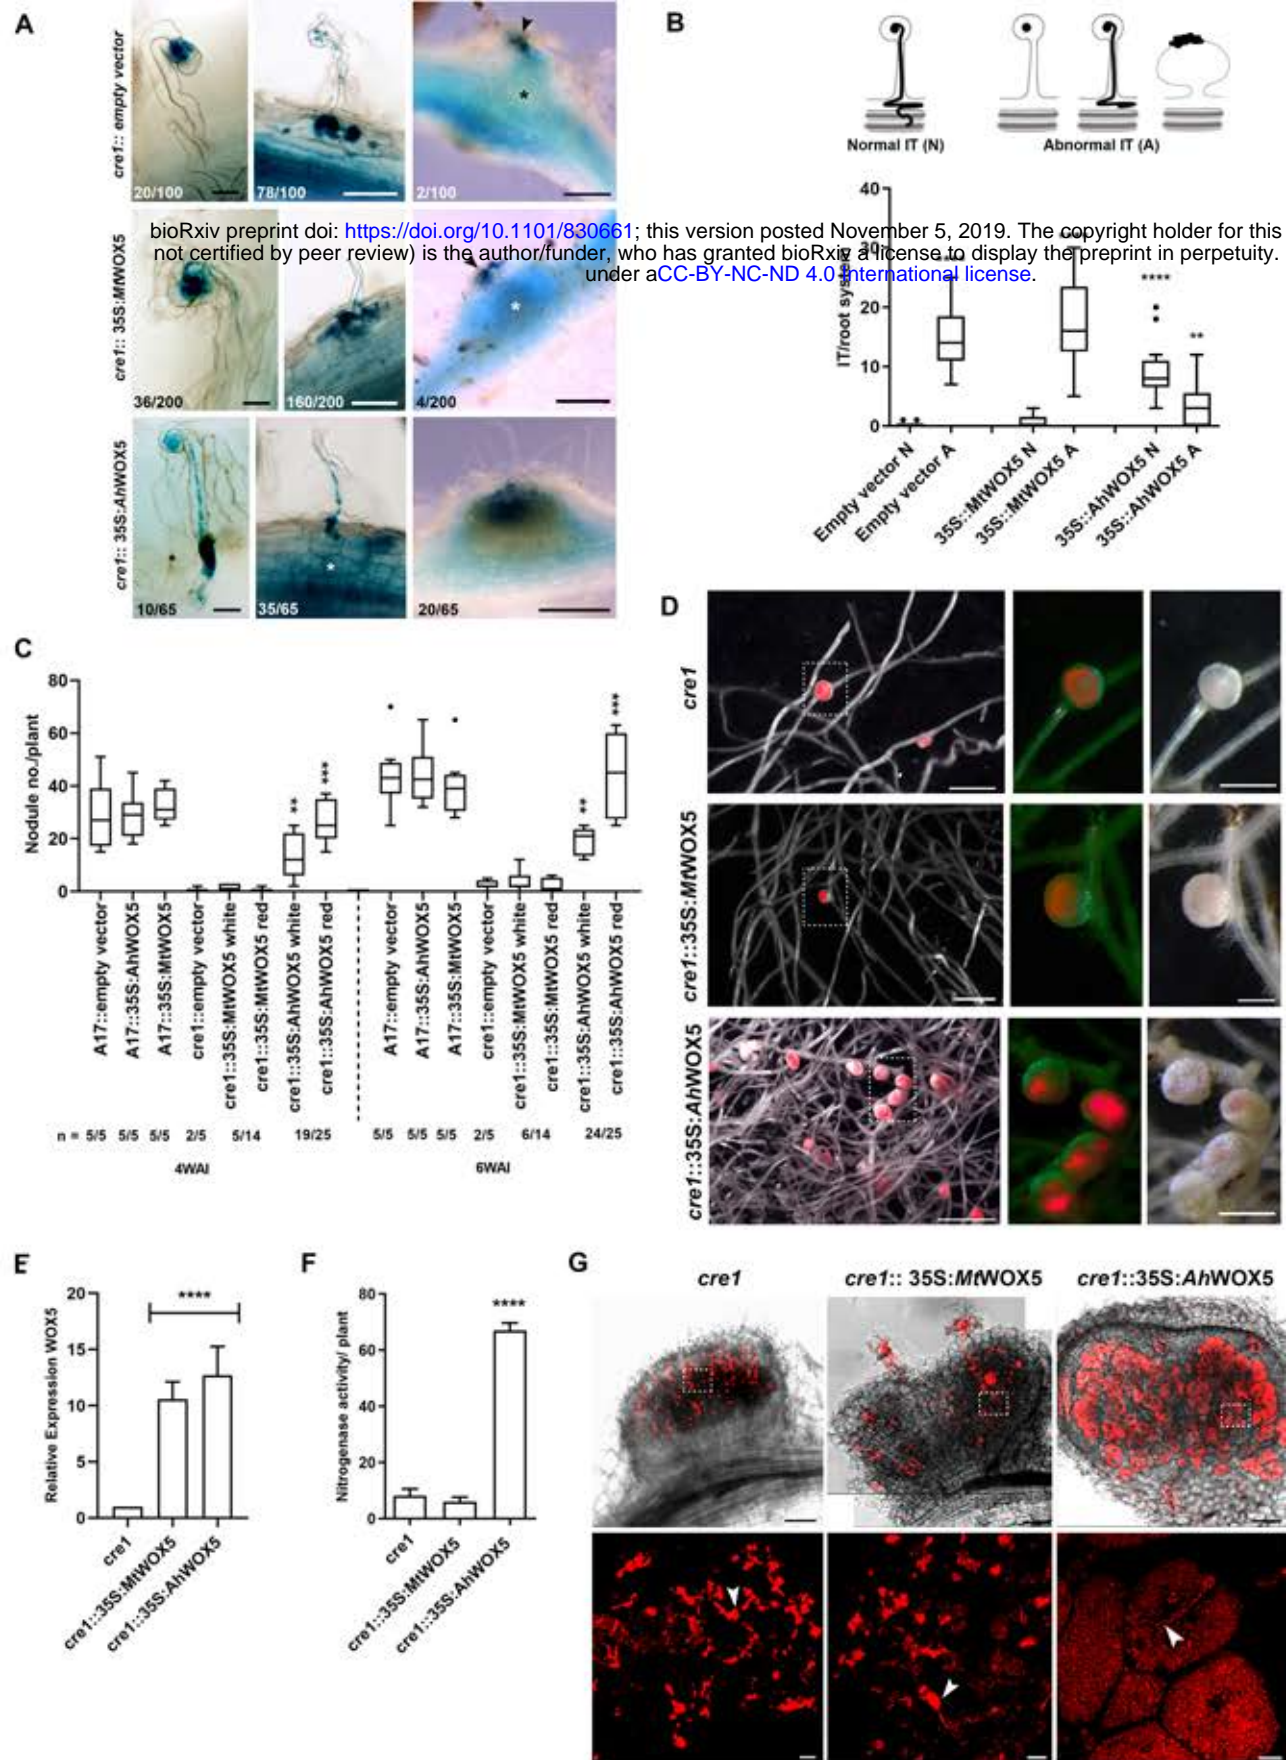

**Figure 3: Complementation of nodulation in hairy-root transformed *cre1* mutants by ectopic expression of *AhWOX5*.** (A) Epidermal infection thread (IT) observed under bright field microscope 2WAI with *Sm1021-pXLGD4-lacZ* in *cre1* roots transformed with empty vector, *p35S::eGFP-MtWOX5* and *p35S::eGFP-AhWOX5*. Total number of each type of infection threads (IT) observed out of the total number of early infection events are indicated at the left-hand corner. Scale bar = 100µm.

Box plot represents (B) IT/ root system and (C) Nodule number/ plant where histogram represent mean  $\pm$  SD. Student's t-test was used to assess significant differences, where \*\*\*\* and \*\* indicates  $P < 0.0001$  and  $P < 0.004$  respectively and n indicates the number of roots systems with infection events per total number of scored roots.

(D) Morphology of nodules in transgenic hairy-roots of *cre1* mutant 4WAI with *Sm2011-pBHR-mRFP*. Representative micrograph of transgenic roots indicated as bright field+ mRFP merged and inset as eGFP+ mRFP merged and bright field. Scale bar = 1mm and inset = 500µm.

(E) qRT-PCR analysis of *MtWOX5* and *AhWOX5* relative to control transformed (*cre1*) roots normalised against *MtActin*. (F) Acetylene reduction assay (nmole  $C_2H_4$ /h/mg nodule) in indicated root system. For E and F, Histogram represents an average of three biological replicates each having  $n > 4$  plants and error bar represents SD. Student's t- test was used to assess significant differences, where \*\*\*\* indicate  $P < 0.0001$ .

(G) Ultrastructure of nodules developed in *cre1* mutant transformed with different constructs where the perforated box represents the infection zone with its corresponding enlarged view below the respective images. Scale bar: G (upper panel) = 100µm and (lower panel) = 10µm. Arrow indicate infection thread and \* indicate cell division.

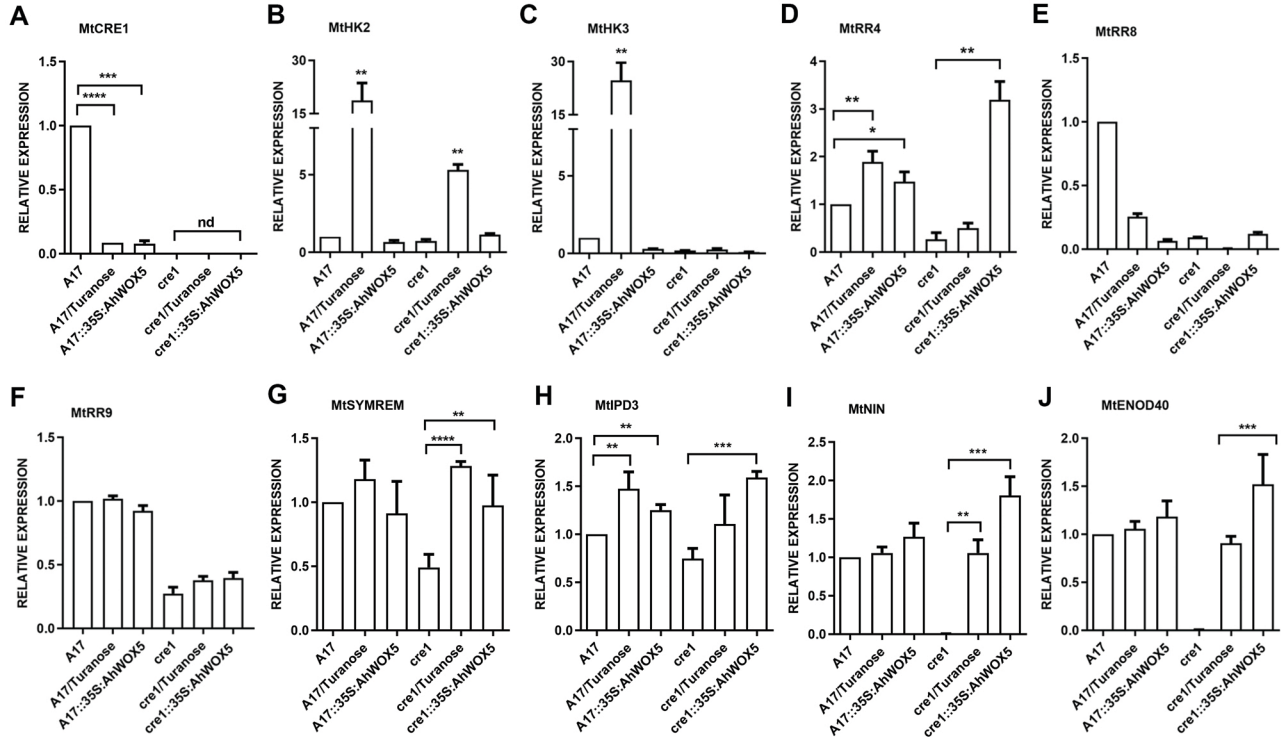

**Figure 4: Differential recruitment of cytokinin signaling and sym pathway during the complementation of *cre1* mutant under turanose treatment and *AhWOX5* ectopic expression.** qRT-PCR analysis of *MtCRE1* (A), *MtHK2* (B), *MtHK3* (C), *MtRR4* (D), *MtRR8* (E) *MtRR9* (F) *MtSYMREM* (G), *MtIPD3* (H), *MtNIN* (I) and *MtENOD40* (J) 4WAI with *Sm2011-pBHR-mRFP* in roots of A17, A17/Turanose, A17::35S:*AhWOX5*, *cre1*, *cre1*/Turanose and *cre1*::35S:*AhWOX5* relative to A17. *MtActin* was used as a reference gene. Histogram represents an average of three biological replicates each having n>4 plants and error bar represents SD. Student's t-test was used to assess significant differences where \*\*\*\*, \*\*\*, \*\* and \* indicate P<0.0001, 0.0001, 0.005 and 0.04 respectively.

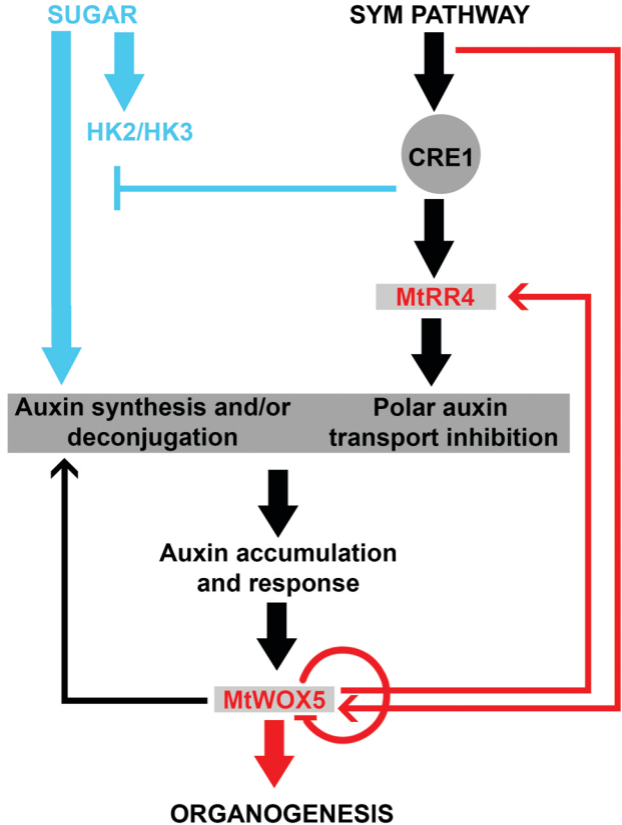

**Figure 5: Proposed Model for the role of sugar signalling and WOX5 expression in restoration of symbiotic efficiency in *M. truncatula* cytokinin perception mutant *cre1*.** Black arrows indicate the known sym pathway dependent CRE1 activation that leads to auxin accumulation and WOX5 induction to generate the nodule primordia. We propose sugar signalling to restore symbiosis in *cre1* by (i) redundant action of Mthk2 that compensates MtCRE1 and by (ii) directly triggering auxin responses that is inhibited by CRE1 (Blue arrows). WOX5 restore symbiosis in *cre1* by induction of (i) *MtRR4* a response regulator required for symbiosis and by directly triggering auxin responses). WOX5 is activated by SYM pathway and its function is governed by post transcriptional homeostatic controls (Red arrows). Forward arrow indicates activation and blunt arrow indicates inactivation.
